# Supplementary material for: The Diversity and Nitrogen Metabolism of Culturable Nitrate-Utilizing Bacteria Within the Oxygen Minimum Zone of the Changjiang (Yangtze River) Estuary
Source: Frontiers journal article supplement (doi:10.3389/fmars.2021.720413), 2021-11-26
Supplement: Table_2.docx [file Table_2.docx]

Supplementary Table 2.The diversity index of 17 different stations

| **Station** | **S(species)** | **N(number)** | **d(richness)** | **J'(evenness)** | **H'(diversity)** |
| --- | --- | --- | --- | --- | --- |
| 3000_2 | 7 | 11 | 2.5022 | 0.94877 | 2.6635 |
| 3050_2 | 6 | 12 | 2.0121 | 0.8593 | 2.2213 |
| 3100_1 | 2 | 4 | 0.72135 | 0.81128 | 0.81128 |
| 3100_2 | 4 | 9 | 1.3654 | 0.87636 | 1.7527 |
| 3100_2a | 8 | 11 | 2.9192 | 0.94845 | 2.8454 |
| 3100_3 | 5 | 7 | 2.0556 | 0.96296 | 2.2359 |
| 3150_2 | 3 | 5 | 1.2427 | 0.96023 | 1.5219 |
| CJ_02 | 4 | 6 | 1.6743 | 0.95915 | 1.9183 |
| DH4_0 | 4 | 8 | 1.4427 | 0.7744 | 1.5488 |
| DH45 | 5 | 21 | 1.3138 | 0.8513 | 1.9766 |
| DH5_0 | 5 | 10 | 1.7372 | 0.91386 | 2.1219 |
| DH5-1a | 7 | 10 | 2.6058 | 0.96957 | 2.7219 |
| DH5_2 | 3 | 6 | 1.1162 | 1 | 1.585 |
| DH5_2a | 7 | 15 | 2.2156 | 0.92836 | 2.6062 |
| DH5-3 | 6 | 13 | 1.9494 | 0.89588 | 2.3158 |
| DH56 | 7 | 13 | 2.3392 | 0.89041 | 2.4997 |
| DH6_1 | 3 | 3 | 1.8205 | 1 | 1.585 |
