# Supplementary material for: The Diversity and Nitrogen Metabolism of Culturable Nitrate-Utilizing Bacteria Within the Oxygen Minimum Zone of the Changjiang (Yangtze River) Estuary
Source: Frontiers journal article supplement (doi:10.3389/fmars.2021.720413), 2021-11-26
Supplement: Table_3.docx [file Table_3.docx]

Supplementary Table 3.Griess test results for representative strains (-, negative result; +,incomplete nitrate reduction; ++, complete nitrate reduction).

| Representative isolates | Nearest phylogenetic neighbor | Griess test result |
| --- | --- | --- |
| FXH-223 | *Alcanivorax marinus* | - |
| FXH-114 | *Aurantimonas coralicida* | + |
| FXH-172 | *Brevundimonas aurantiaca* | - |
| FXH-124 | *Halomonas axialensis* | - |
| FXH-294 | *Halomonas meridiana* | ++ |
| FXH-235 | *Marinobacter algicola* | - |
| FXH-314 | *Marinobacter nauticus* | ++ |
| FXH-73 | *Marinomonas communis* | - |
| FXH-192 | *Microbacterium schleiferi* | - |
| FXH-28 | *Microbacterium testaceum* | - |
| FXH-315 | *Oceanimonas baumannii* | - |
| FXH-42 | *Pseudomonas aeruginosa* | + |
| FXH-240 | *Pseudomonas aestusnigri* | - |
| FXH-27 | *Sphingobium lactosutens* | - |
| FXH-122 | *Sphingobium naphthae* | - |
| FXH275-2 | *Sphingobium soli* | - |
| FXH-168 | *Staphylococcus edaphicus* | - |
| FXH-213 | *Stappia indica* | - |
| FXH-147 | *Thalassospira povalilytica* | + |
| FXH-305 | *Vibrio anguillarum* | - |
| FXH-72 | *Vibrio azureus* | + |
| FXH-286 | *Vibrio campbellii* | ++ |
| FXH-250 | *Vibrio natriegens* | ++ |
| FXH-99 | *Zunongwangia profunda* | - |
